# Supplementary material for: Unexpected interconversion reaction of 1,4-diaminofullerenes
Source: Royal Society of Chemistry journal article supplement (doi:10.1039/b601880g), 2006-01-01
Supplement: b601880g.pdf [file b601880g.pdf]

Electronic Supplementary Information (ESI)

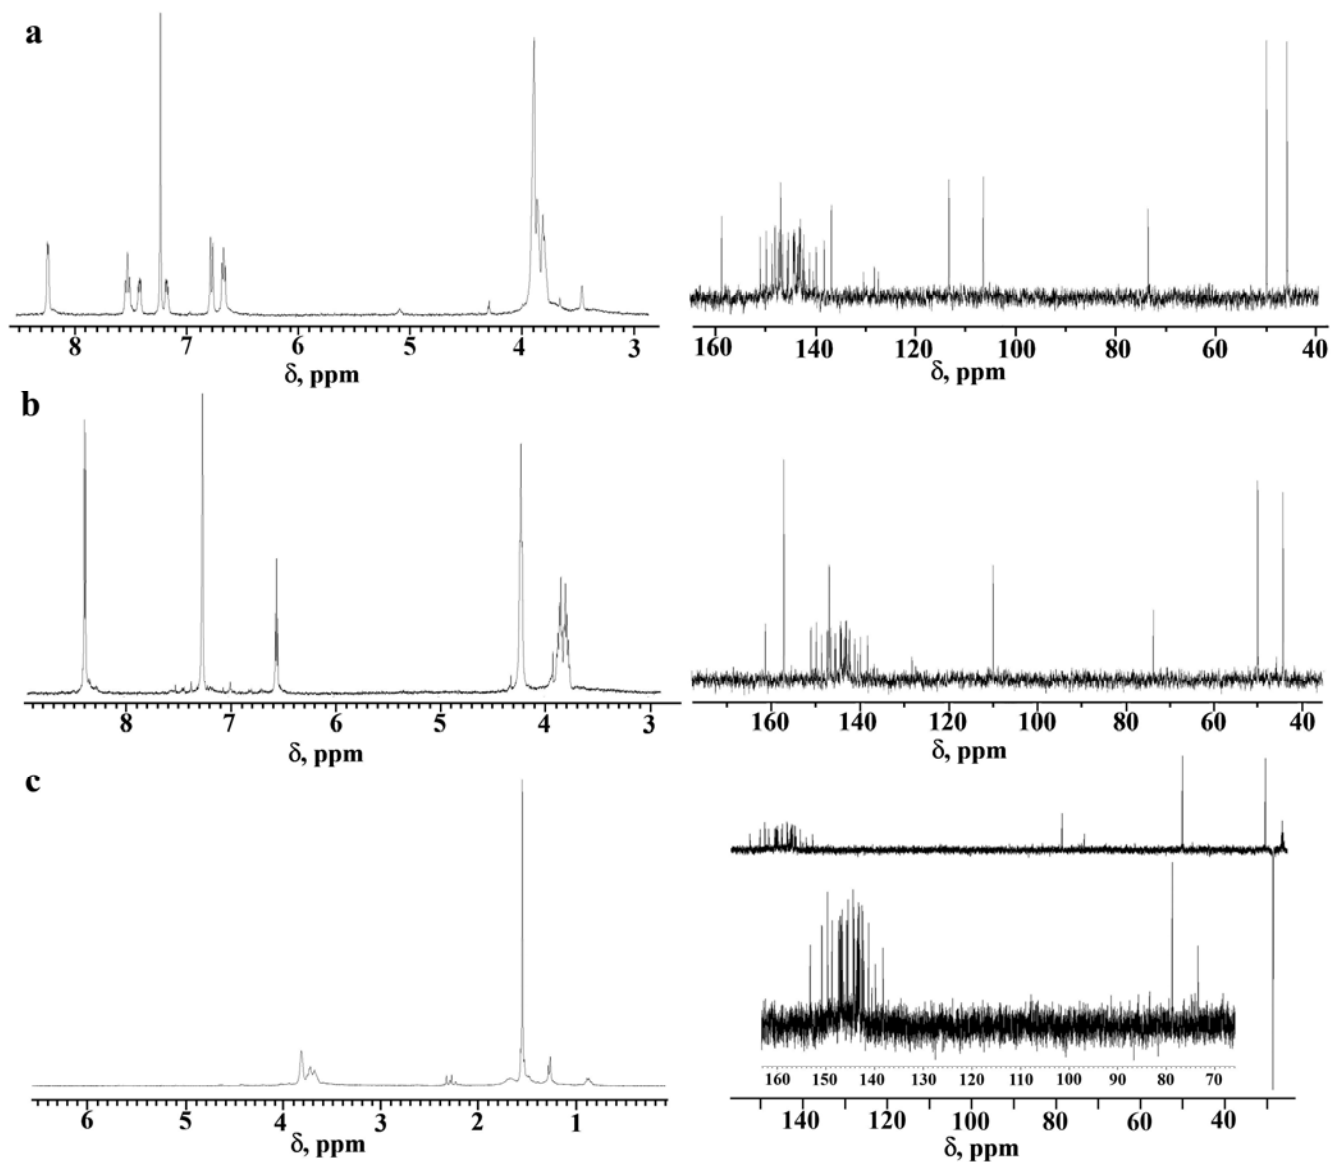

The  $^1\text{H}$  (left) and  $^{13}\text{C}$  NMR spectra of compounds 1 (a), 3a (b) and 3b (c)

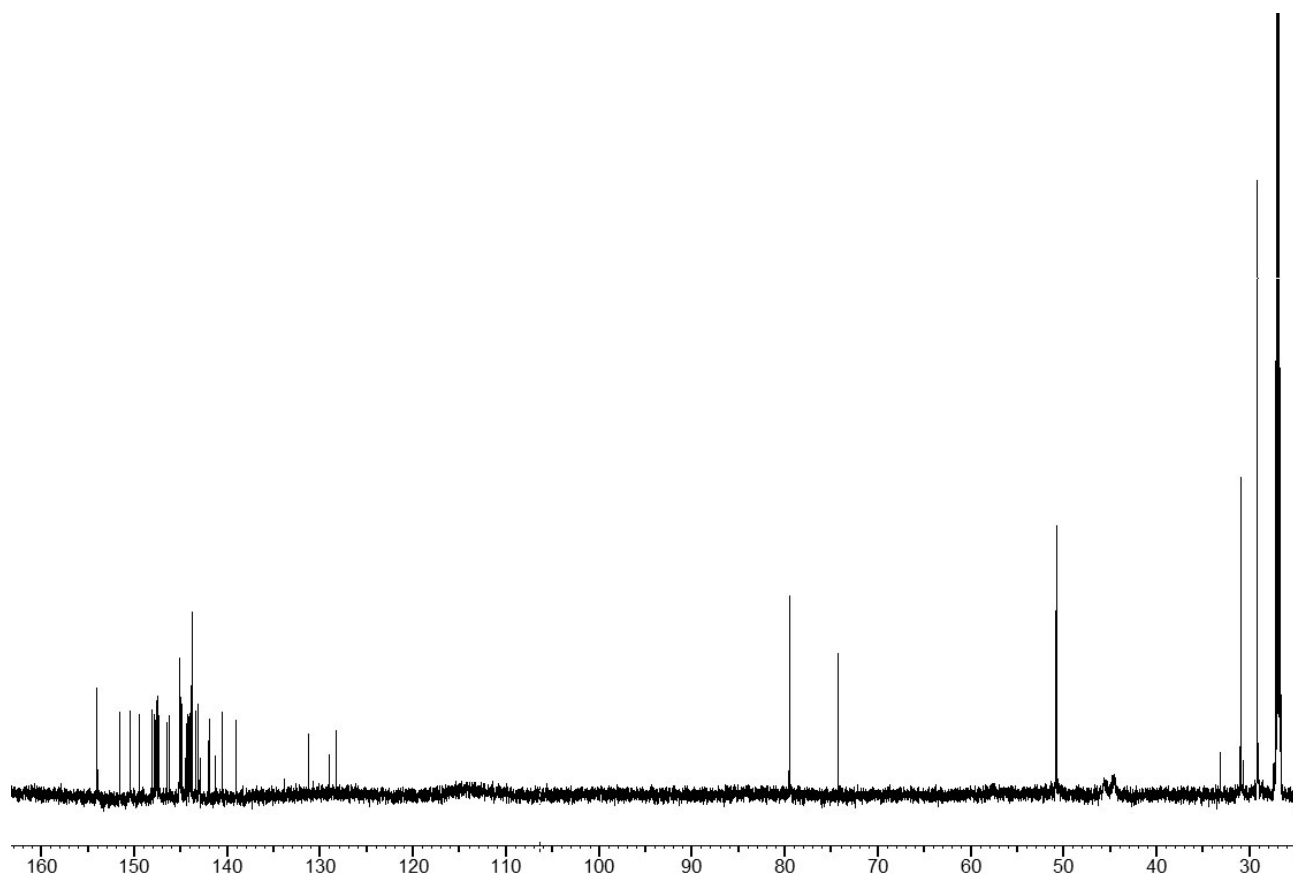

The  $^{13}\text{C}$  NMR spectrum of **3b** (150 MHz)

### *Reactions of **3a** and **1** with *N*-(2-pyridyl)piperazine*

Diaminofullerene **3a** or **1** (50 mg, 0.048 mmol) was dissolved in 80 ml of 1,2-dichlorobenzene and then *N*-(2-pyridyl)piperazine was added (76.7 mg or 0.47 mmol for **3a**; 390 mg or 2.39 mmol for **1**). After that the reaction mixture was stirred in an opened flask and irradiated from the top by 60W incandescent light bulb within 6 h. Then the reaction mixtures were diluted by toluene and *n*-hexane (1:3:3 v./v. ratio). Resulting solutions were filtered and poured at the top of silica gel column (Acros Organics, 30-75 $\mu$ , 90 Å) pre-eluted with 1:1 v./v. hexane : toluene mixture. Passing toluene : MeOH 99:1 v./v. mixture through the column yielded two fractions. The first one corresponded to a small amount of compound **1** (ca. 2-3% yield); the second one was a major fraction (55-60 mg) and corresponded to a complex mixture of products.

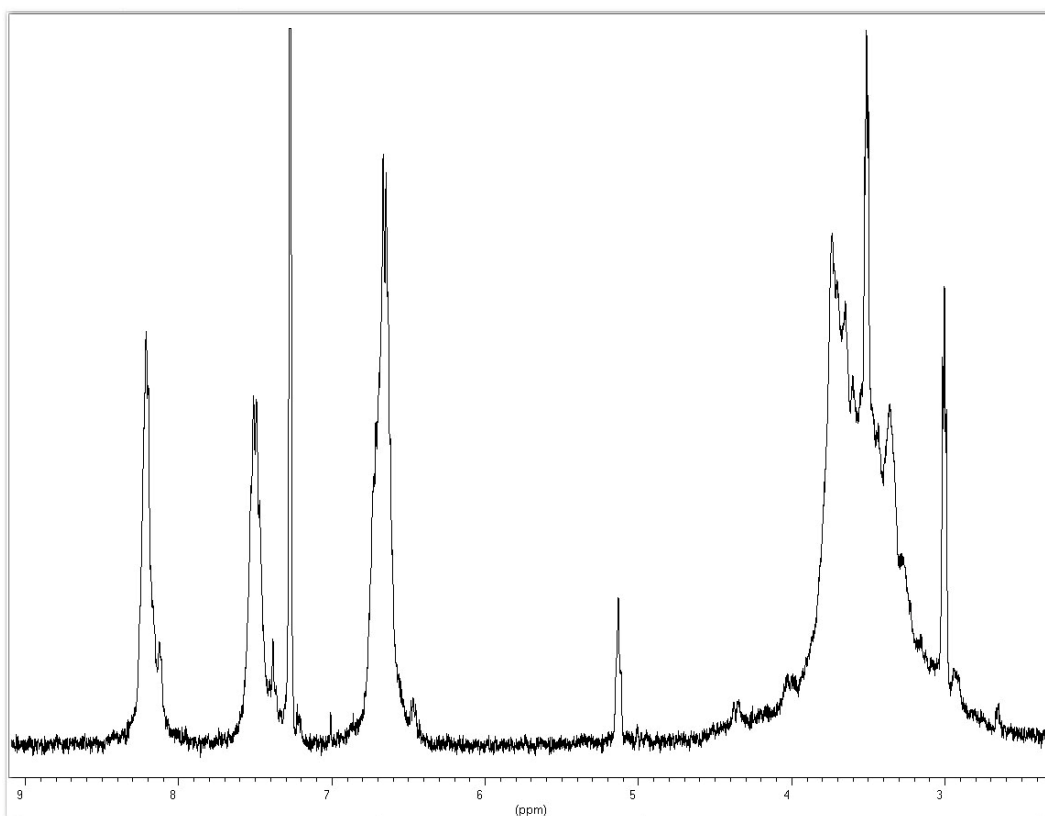

**The  $^1\text{H}$  NMR spectrum of the polyaddition product**

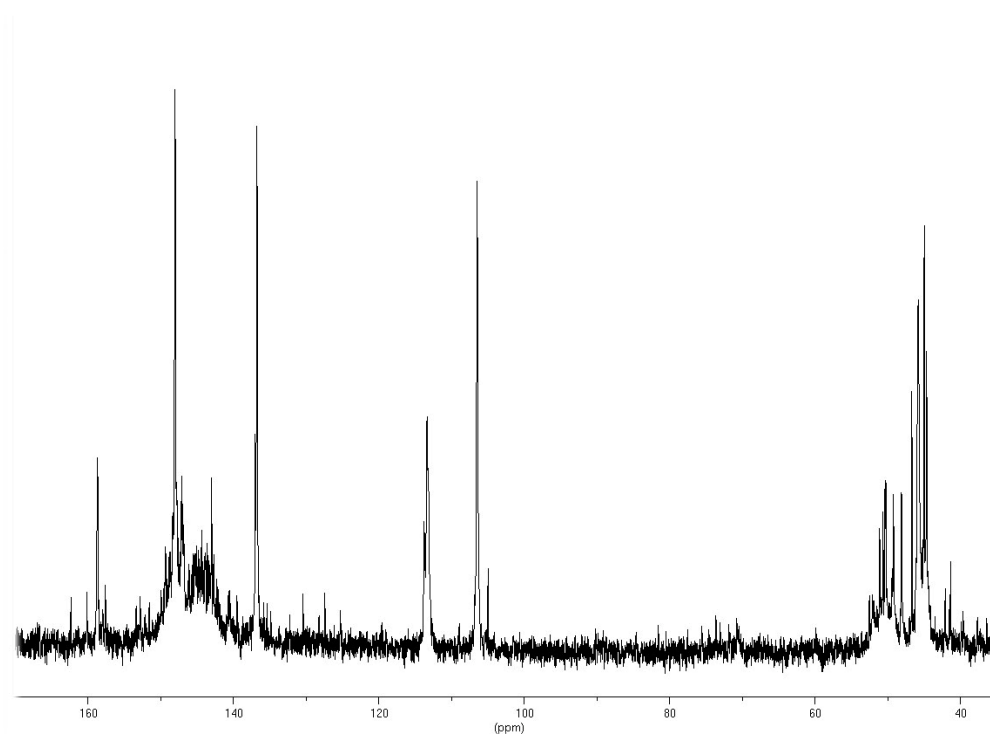

**The  $^{13}\text{C}$  NMR spectrum of the polyaddition product**
